# Supplementary material for: Detection of low molecular weight adulterants in beverages by direct analysis in real time mass spectrometry
Source: Royal Society of Chemistry journal article supplement (doi:10.1039/c6ay00292g), 2016-01-01
Supplement: c6ay00292g1.pdf [file c6ay00292g1.pdf]

## Supplementary Information for

# “Detection of Low Molecular Weight Adulterants in Beverages by Direct Analysis in Real Time Mass Spectrometry”

Edward Sisco<sup>a\*</sup> and Jeffrey Dake

<sup>a</sup>National Institute of Standards and Technology, Materials Measurement Science Division,  
Gaithersburg, MD, USA

<sup>b</sup>United States Army Criminal Investigation Laboratory,  
Gillem Enclave, GA 30297, United States

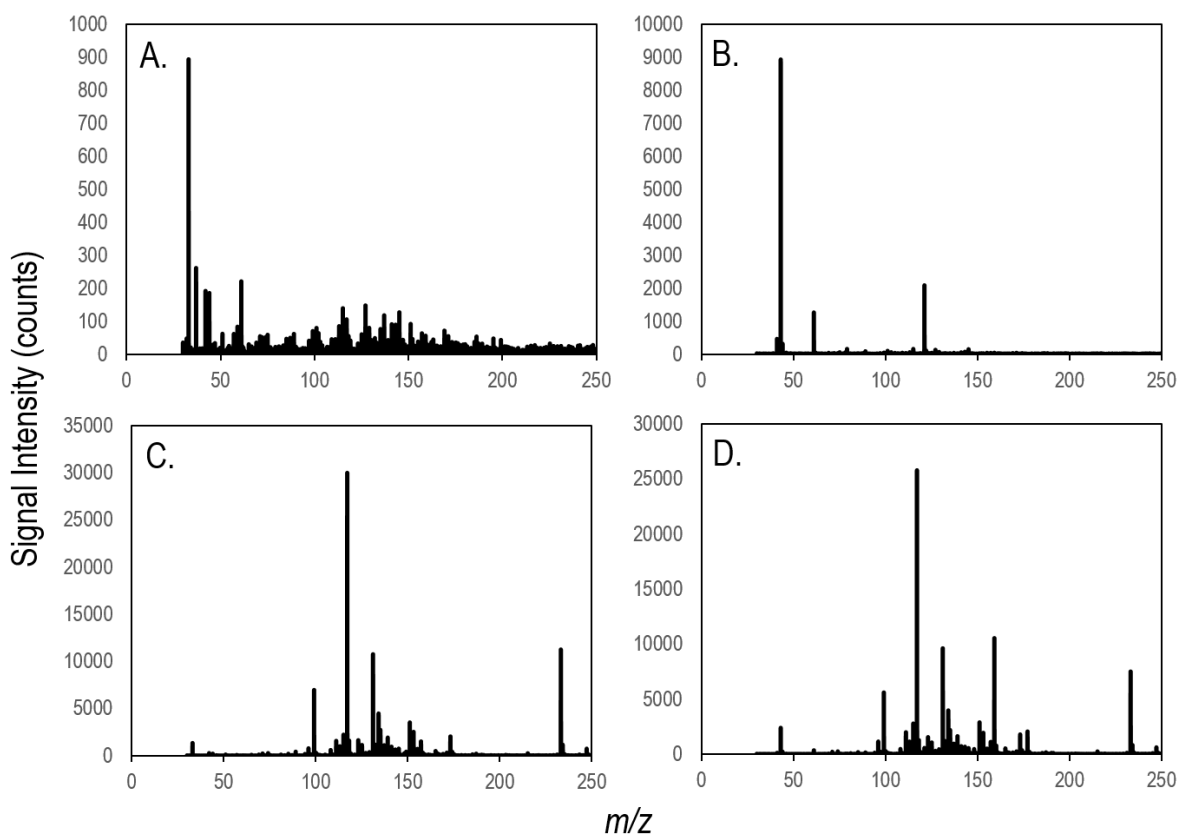

**Figure S1.** Positive ion mass spectra of methanol (A. & C.) and 1-propanol (B. & D.) both neat (A. & B.) and in the presence of hexanoic acid (C. & D.).

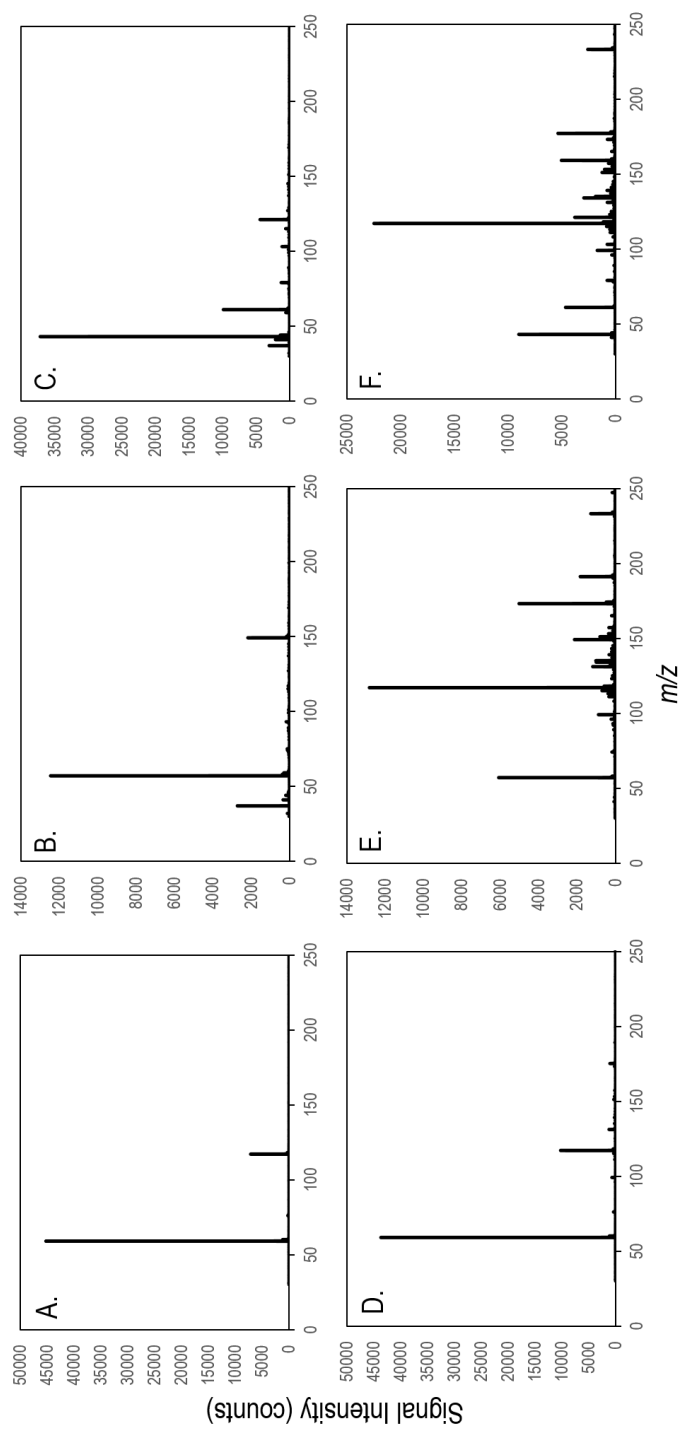

**Figure S2.** Positive ion mass spectra of acetone (A. & D.), 1-butanol (B. & E.), and 2-propanol (C. & F.) both neat (A., B., & C.) and in the presence of hexanoic acid (D., E., & F.).

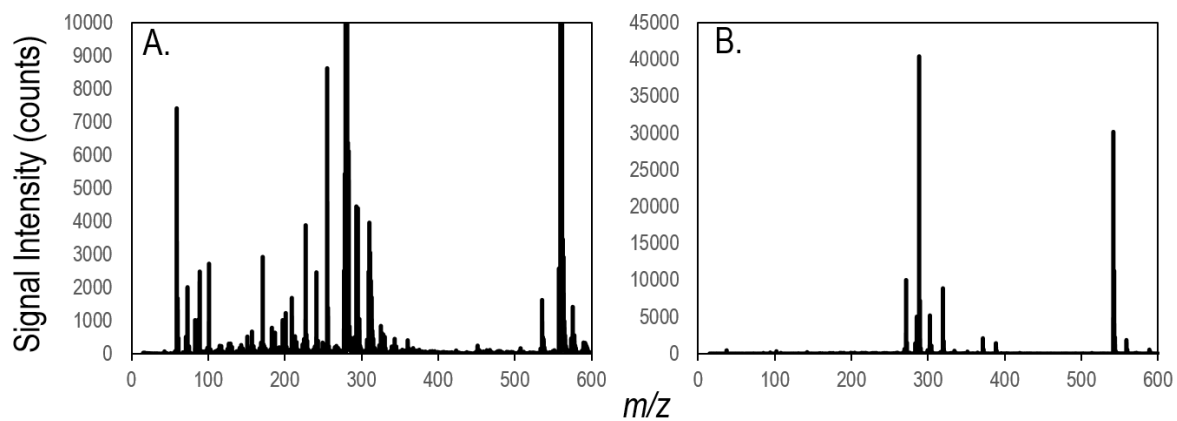

**Figure S3.** Representative mass spectra of NaClO in negative mode with the presence of linoleic acid (A.) and  $\text{NH}_4\text{OH}$  in positive mode in the presence of methyl palmitate (B.).

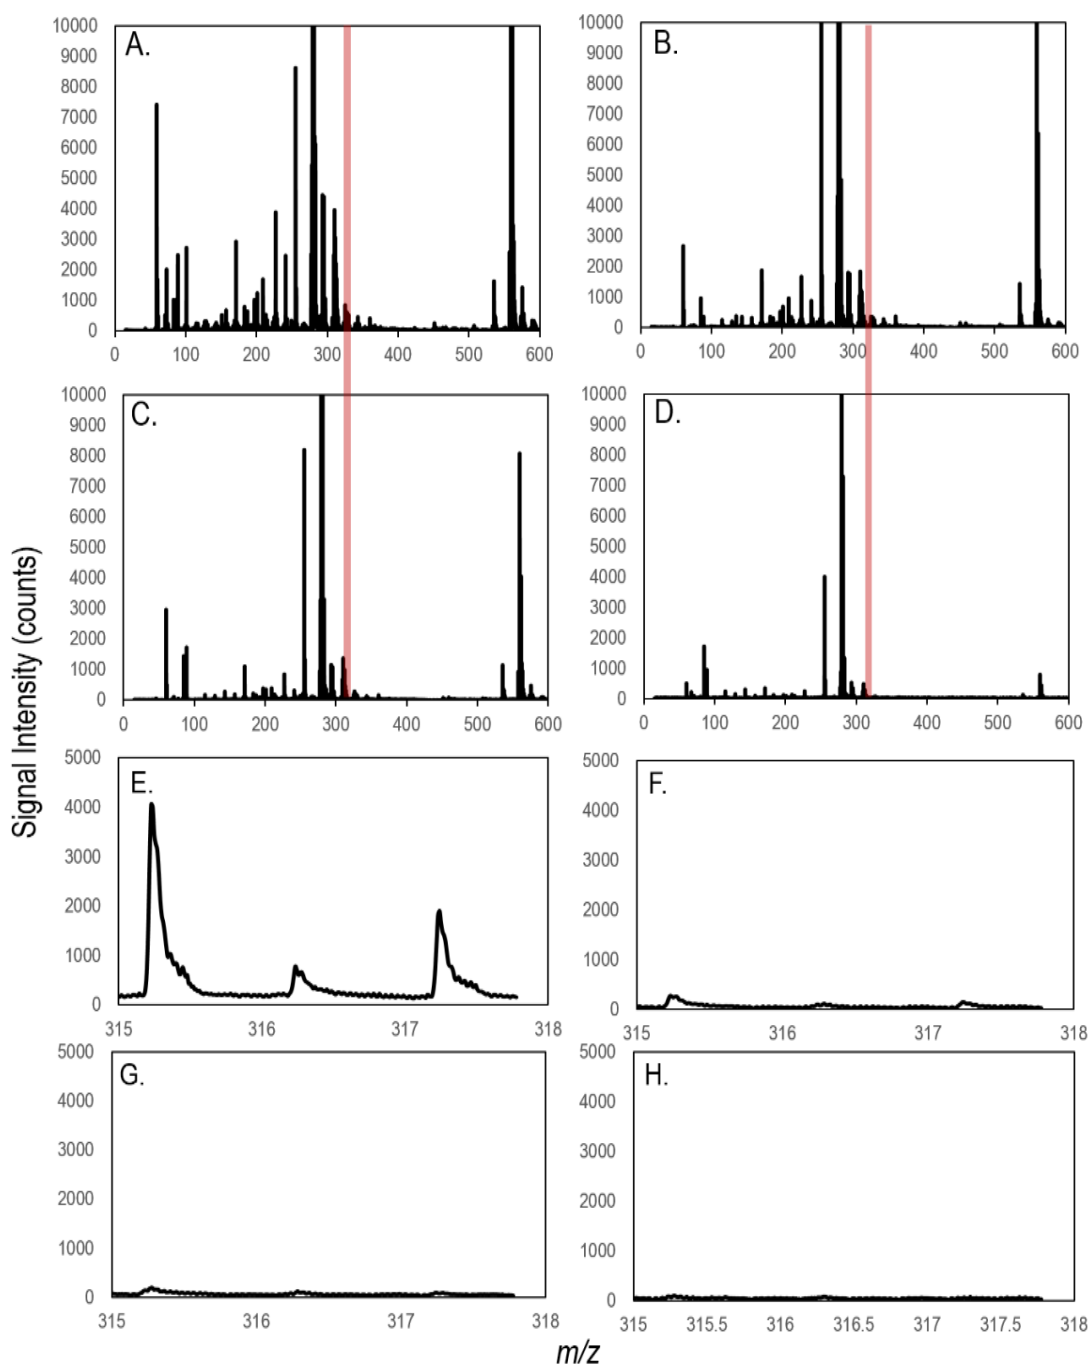

**Figure S4.** Representative mass spectra of NaClO (A.), NaCl (B.), KClO<sub>3</sub> (C.) and KClO<sub>4</sub> (D.) in the presence of linoleic acid. Location of the [Linoleic Acid+ClO-O]<sup>-</sup> adduct, specific to ClO<sup>-</sup>, identified with red bar. Expanded mass spectra of the adduct ion (315 *m/z* and 317 *m/z*) for NaClO (E.), NaCl (F.), KClO<sub>3</sub> (G.), and KClO<sub>4</sub> (H.) are also shown.

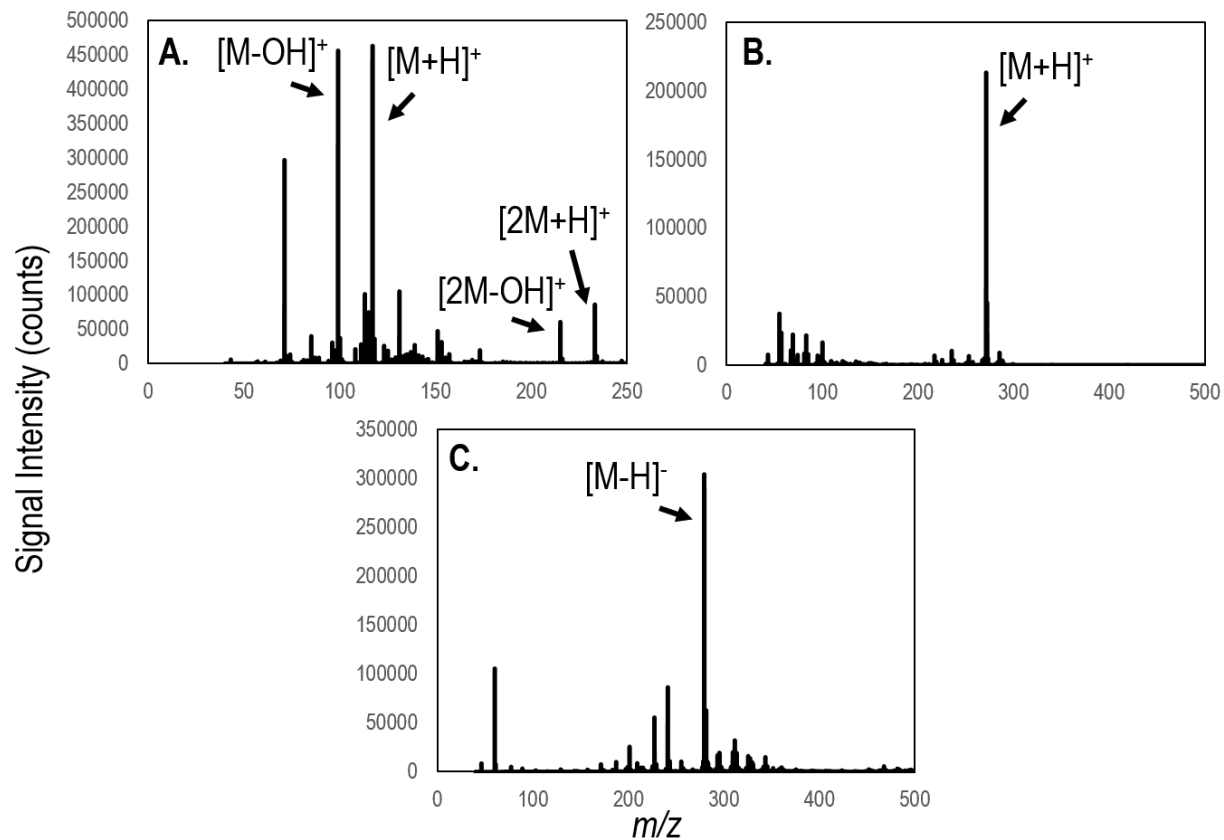

**Figure S5.** Representative mass spectra of the dopants (hexanoic acid (A.), methyl palmitate (B.), and linoleic acid (C.)) analyzed without an adulterants present. Select peaks of interest are also highlighted. Hexanoic acid and methyl palmitate were analyzed in positive mode while linoleic acid was analyzed in negative mode.

|                 | MeOH   | EtOH   | PrOH   | IPA   | BuOH   | Ace   | EG     | NH <sub>4</sub> OH | NaClO  |
|-----------------|--------|--------|--------|-------|--------|-------|--------|--------------------|--------|
| Coca-Cola®      | Green  | Green  | Green  | Green | Green  | Green | Green  | Green              | Green  |
| Mountain Dew®   | Green  | Green  | Green  | Green | Green  | Green | Green  | Green              | Green  |
| 2 % Milk        | Green  | Green  | Green  | Green | Green  | Green | Green  | Yellow             | Yellow |
| Cranberry Juice | Green  | Green  | Green  | Green | Green  | Green | Green  | Green              | Green  |
| Orange Juice    | Green  | Green  | Green  | Green | Green  | Green | Green  | Green              | Green  |
| Pineapple Juice | Green  | Green  | Green  | Green | Green  | Green | Green  | Green              | Green  |
| Unsweetened Tea | Green  | Green  | Green  | Green | Green  | Green | Green  | Green              | Green  |
| Red Bull®       | Yellow | Yellow | Green  | Green | Green  | Green | Green  | Green              | Green  |
| Gatorade®       | Green  | Green  | Green  | Green | Green  | Green | Green  | Green              | Green  |
| Coors®          | Red    | Black  | Yellow | Red   | Green  | Green | Green  | Green              | Green  |
| Hard Cider      | Red    | Black  | Yellow | Red   | Green  | Green | Green  | Green              | Green  |
| Pinot Noir      | Red    | Black  | Yellow | Red   | Green  | Green | Green  | Green              | Green  |
| Vodka           | Red    | Black  | Red    | Red   | Yellow | Green | Yellow | Green              | Green  |
| Rum             | Red    | Black  | Red    | Red   | Yellow | Green | Yellow | Green              | Green  |
| Whiskey         | Red    | Black  | Red    | Red   | Yellow | Green | Yellow | Green              | Green  |

**Table S1.** Detection of adulterants out of the fifteen beverages examined. A green cell indicates detection was possible at at least 0.1 % v/v. A yellow cell indicates detection was possible at 1.0 % v/v but not at 0.1% v/v. A red cell indicates that detection was not possible at or below a level of 1.0 % v/v. Black shaded cells were not tested because the beverage contained the adulterant.
